# Supplementary material for: Systemic analysis of stress transcriptomics of Synechocystis reveals common stress genes and their universal triggers
Source: Royal Society of Chemistry journal article supplement (doi:10.1039/c6mb00551a), 2016-08-18
Supplement: c6mb00551a1.pdf [file c6mb00551a1.pdf]

**Table S1.** Experimental data used for generation of Venn diagrams.

| Stress           | Cell exposure conditions                                                                                                             | Reference |
|------------------|--------------------------------------------------------------------------------------------------------------------------------------|-----------|
| Heat stress      | 20, 30, 60 min, a shift from 34°C to 44°C<br>70 $\mu\text{mol photons}/(\text{m}^2 \text{ s})$ ; 1% $\text{CO}_2$                    | 2,3       |
| Cold stress      | 15, 20, 30 min, a shift from 34°C to 22°C<br>70 $\mu\text{mol photons}/(\text{m}^2 \text{ s})$ ; 1% $\text{CO}_2$                    | 1,3,16    |
| Salt stress      | 15, 20, 30 min, 0.5 M NaCl<br>70 $\mu\text{mol photons}/(\text{m}^2 \text{ s})$ ; 1% $\text{CO}_2$                                   | 3,5       |
| Osmotic stress   | 15, 20, 30, 60, 120 min; 0.5 M sorbitol<br>70 $\mu\text{mol photons}/(\text{m}^2 \text{ s})$ ; 1% $\text{CO}_2$                      | 4,13      |
| Light stress     | 15, 60 min a shift from 20 to 300 $\mu\text{mol photons}/(\text{m}^2 \text{ s})$<br>32°C; 1% $\text{CO}_2$                           | 6,9       |
| Oxidative stress | 15 min, 10 $\mu\text{M}$ methylviologen, 30°C, 50 $\mu\text{mol photons}/(\text{m}^2 \text{ s})$ ; 1% $\text{CO}_2$                  | 9         |
|                  | 15, 30 min; 3 mM $\text{H}_2\text{O}_2$ ; 30°C; 30 $\mu\text{mol photons}/(\text{m}^2 \text{ s})$ ; 3,78 mM $\text{Na}_2\text{CO}_3$ | 6,9,39    |
| Redox            | 60 min, 10 $\mu\text{M}$ DCMU at 20 and 300 $\mu\text{mol photons}/(\text{m}^2 \text{ s})$ ;                                         | 4,8       |
|                  | 60 min, 10 $\mu\text{M}$ DBMIB at 20 and 300 $\mu\text{mol photons}/(\text{m}^2 \text{ s})$ ; 30°C, 1% $\text{CO}_2$                 |           |
| UV-B             | UV-B (wavelength range 280–320 nm) at 20 $\mu\text{mol photons}/(\text{m}^2 \text{ s})$                                              | 7         |
| Low pH           | 30°C; 30 $\mu\text{mol photons}/(\text{m}^2 \text{ s})$ ; transfer from pH 8.0 to pH 2.5 without $\text{CO}_2$                       | 10,11     |

**Venn diagrams** were created using transcriptomics experimental data from studies of the responses of *Synechocystis* sp. strain PCC 6803 to heat and cold shock; salt, osmotic, light, UV-B, and oxidative stresses; and changes in the redox status of cells (Tables S2 and S3). The exposure periods varied from 15 to 120 min; similar conditions were used in control tests. The same platform (Takara, Japan) was used for DNA microarray transcriptomics data in all experiments with the exception of UV-B, which was analyzed with custom-made DNA microarrays. Genes with at least two-fold changes transcription were selected for the analysis. A gene was assigned the rank +1 if it was upregulated, –1 if it was downregulated, and 0 if its transcription remained unchanged. A gene was considered to be induced by heat, salt, or osmotic stress if its rank was +1 in, at least, two experimental studies of the respective stressor. In case of light stress, oxidative stress, or changes in the redox status of the photosynthetic ETC, a gene was considered to be induced if its rank was +1 in, at least, one respective experimental study. Venn diagrams were constructed with the InteractiVenn online tool (<http://www.interactivenn.net>).

**Table S2.** Genes that are highly induced by heat shock and other stressors in the cyanobacterium *Synechocystis* sp. strain PCC 6803

| ORF                         | Gene                        | Protein            | Function                                | Abiotic stressor |      |      |       |      |    | Redox |      | ROS |
|-----------------------------|-----------------------------|--------------------|-----------------------------------------|------------------|------|------|-------|------|----|-------|------|-----|
|                             |                             |                    |                                         | Heat             | Salt | Osmo | Light | UV-B | pH | DBMIB | DCMU |     |
| <i>slr1285</i>              | <i>hik34</i>                | Hik34              | Sensory histidine kinase 34             | +                | +    | +    |       | +    | +  | +     |      | +   |
| <i>sll0306</i>              | <i>sigB</i>                 | SigB               | RNA polymerase $\sigma$ factor B        | +                | +    | +    |       | +    | +  | +     |      | +   |
| <i>sll2012</i> <sup>1</sup> | <i>sigD</i> <sup>1</sup>    | SigD <sup>1</sup>  | RNA polymerase $\sigma$ factor D        | +                | +    |      | +     | +    | +  | +     | +    | +   |
| <i>slr2075</i>              | <i>groES</i>                | GroES              | HSP 10 kDa chaperone                    | +                | +    | +    | +     | +    |    | +     |      |     |
| <i>slr2076</i>              | <i>groEL1</i>               | GroEL1             | HSP 60 kDa chaperone 1                  | +                | +    | +    | +     | +    |    | +     |      |     |
| <i>slr0416</i>              | <i>groEL2</i>               | GroEL2             | HSP 60 kDa chaperone 2                  | +                | +    | +    | +     |      |    |       |      |     |
| <i>sll1514</i>              | <i>hspA</i>                 | HspA               | HSP 17 kDa                              | +                | +    | +    | +     | +    | +  | +     |      | +   |
| <i>sll0170</i>              | <i>dnaK2</i>                | DnaK2              | HSP 70 kDa                              | +                | +    | +    | +     | +    | +  | +     |      | +   |
| <i>slr0093</i>              | <i>dnaJ</i>                 | DnaJ               | HSP 40 kDa                              | +                | +    | +    |       | +    | +  | +     |      | +   |
| <i>sll0430</i>              | <i>htpG</i>                 | HtpG               | HSP 90 kDa                              | +                | +    | +    | +     | +    |    | +     |      |     |
| <i>slr1641</i>              | <i>clpB1</i>                | ClpB1              | HSP 100 kDa chaperone                   | +                | +    | +    | +     | +    |    | +     |      | +   |
| <i>slr1204</i>              | <i>htrA</i>                 | HtrA               | Serine protease                         | +                | +    | +    |       | +    | +  | +     |      | +   |
| <i>slr0008</i>              | <i>ctpA</i>                 | CtpA               | C-terminal processing protease          | +                |      |      | +     | +    | +  |       |      | +   |
| <i>sll1621</i>              | <i>sll1621</i>              | PrxA               | Peroxisredoxin                          | +                | +    |      | +     | +    |    | +     |      | +   |
| <i>slr0095</i>              | <i>smtA</i>                 | SmtA               | S-adenosylmethyonine methyltransferase  | +                | +    |      | +     |      |    | +     |      | +   |
| <i>slr1674</i>              | <i>slr1674</i>              | Slr1674            | Thermal defense of PS II                | +                | +    |      | +     | +    | +  | +     |      | +   |
| <i>slr1963</i>              | <i>ocpA</i>                 | OCP                | Orange carotenoid protein               | +                |      | +    | +     | +    |    | +     |      |     |
| <i>slr1512</i> <sup>1</sup> | <i>sbtA</i> <sup>1</sup>    | SbtA <sup>1</sup>  | Na-dependent bicarbonate transporter    | +                |      |      | +     |      |    |       |      | +   |
| <i>slr1516</i>              | <i>sodB</i>                 | SodB               | Superoxide dismutase                    | +                | +    | +    | +     | +    | +  |       |      |     |
| <i>sll0528</i>              | <i>sll0528</i>              | Sll0528            | Site-2 metalloprotease                  | +                | +    | +    | +     | +    | +  | +     |      | +   |
| <i>slr1675</i>              | <i>hypA1</i>                | HypA1              | Hydrogenase synthesis protein           | +                | +    | +    | +     | +    | +  | +     |      | +   |
| <i>ssl3044</i> <sup>1</sup> | <i>ssl3044</i> <sup>1</sup> | Fdx <sup>1</sup>   | Ferredoxin, hydrogenase component       | +                | +    | +    | +     | +    | +  | +     |      | +   |
| <i>slr1687</i> <sup>1</sup> | <i>nblB1</i> <sup>1</sup>   | NblB2 <sup>1</sup> | Phycobilisome degradation protein       | +                | +    | +    | +     | +    | +  | +     | +    | +   |
| <i>sll0939</i>              | <i>sll0939</i>              | Sll0939            | Resistance to low pH                    | +                | +    | +    |       | +    | +  | +     | +    | +   |
| <i>slr0967</i>              | <i>slr0967</i>              | Slr0967            | Resistance to low pH                    | +                | +    | +    |       | +    | +  | +     | +    | +   |
| <i>sll0668</i>              | <i>sll0668</i>              | ISY352e2           | Transposase                             | +                | +    |      | +     |      |    |       |      |     |
| <i>slr1686</i> <sup>1</sup> | <i>slr1686</i> <sup>1</sup> |                    | Protein of unknown function             | +                | +    |      | +     | +    |    |       |      | +   |
| <i>sll1862</i> <sup>1</sup> | <i>sll1862</i> <sup>1</sup> |                    | Unknown protein                         | +                | +    | +    |       |      |    |       |      | +   |
| <i>slr1603</i>              | <i>slr1603</i>              |                    | Protein of unknown function             | +                | +    | +    |       | +    |    | +     |      | +   |
| <i>sll1853</i> <sup>1</sup> | <i>sll1853</i> <sup>1</sup> |                    | Protein of unknown function             | +                | +    |      |       |      |    | +     |      |     |
| <i>sll0846</i>              | <i>sll0846</i>              |                    | Protein of unknown function             | +                | +    | +    | +     | +    | +  | +     |      | +   |
| <i>sll1884</i>              | <i>sll1884</i>              |                    | Protein of unknown function             | +                | +    | +    | +     |      |    |       |      | +   |
| <i>sll1009</i>              | <i>frpC</i>                 | FrpC               | Fe-regulated membrane protein           | +                |      |      |       |      |    |       |      | ±   |
| <i>sll0982</i>              | <i>sll0982</i>              |                    | Protein of unknown function             | +                |      |      |       |      |    |       |      | ±   |
| <i>slr1127</i>              | <i>slr1127</i>              |                    | Protein of unknown function             | +                |      |      |       |      |    |       |      | ±   |
| <i>sll1673</i> <sup>2</sup> | <i>rre2</i> <sup>2</sup>    | Rre2 <sup>2</sup>  | Response regulator Rre2                 | +                |      |      |       |      |    |       |      |     |
| <i>sll1501</i> <sup>2</sup> | <i>cbiA</i> <sup>2</sup>    | CbiA <sup>2</sup>  | Cobalamin biosynthesis protein          | +                |      |      |       |      |    |       |      |     |
| <i>slr1377</i> <sup>2</sup> | <i>lepB</i> <sup>2</sup>    | LepB <sup>2</sup>  | Leader peptidase                        | +                |      |      |       |      |    |       |      |     |
| <i>slr1597</i> <sup>2</sup> | <i>parA</i> <sup>2</sup>    | ParA <sup>2</sup>  | Chromosome partitioning ATPase          | +                |      |      |       |      |    |       |      |     |
| <i>ssl3364</i> <sup>2</sup> | <i>ssl3364</i> <sup>2</sup> | Cp12 <sup>2</sup>  | Intrinsically disordered family protein | +                |      |      |       |      |    |       |      |     |
| <i>sll0441</i> <sup>2</sup> | <i>sll0441</i> <sup>2</sup> |                    | Protein of unknown function             | +                |      |      |       |      |    |       |      |     |
| <i>sll1892</i> <sup>2</sup> | <i>sll1892</i> <sup>2</sup> |                    | Protein of unknown function             | +                |      |      |       |      |    |       |      |     |
| <i>sll1433</i> <sup>2</sup> | <i>sll1433</i> <sup>2</sup> |                    | Protein of unknown function             | +                |      |      |       |      |    |       |      |     |
| <i>slr0069</i> <sup>2</sup> | <i>slr0069</i> <sup>2</sup> |                    | Protein of unknown function             | +                |      |      |       |      |    |       |      |     |
| <i>slr0670</i> <sup>2</sup> | <i>slr0670</i> <sup>2</sup> |                    | Protein of unknown function             | +                |      |      |       |      |    |       |      |     |
| <i>slr1812</i> <sup>2</sup> | <i>slr1812</i> <sup>2</sup> |                    | Protein of unknown function             | +                |      |      |       |      |    |       |      |     |
| <i>slr1813</i> <sup>2</sup> | <i>slr1813</i> <sup>2</sup> |                    | Protein of unknown function             | +                |      |      |       |      |    |       |      |     |
| <i>slr1814</i> <sup>2</sup> | <i>slr1814</i> <sup>2</sup> |                    | Protein of unknown function             | +                |      |      |       |      |    |       |      |     |

<sup>1</sup> Genes that are induced by both heat and cold shock; <sup>2</sup> genes that are specifically induced by heat shock. “±” indicates the uncertainty in the results: at least, one or more set of data give positive result, while another set(s) of data demonstrate(s) negative result. ORF, open reading frame. Heat, heat stress (44°C); Salt, salt stress (0.5 M NaCl); Osmo, hyperosmotic stress (0.5 M sorbitol); Light, light stress (300  $\mu$ mol photons/(m<sup>2</sup> s)); UV, exposure to UVB; pH, lower pH ~4.0; DBMIB, 10  $\mu$ M 2,5-dibromo-6-isopropyl-3-methyl-1,4-benzoquinone; DCMU, 10  $\mu$ M 3-(3,4-dichlorophenyl)-1,1-dimethylurea; H<sub>2</sub>O<sub>2</sub>, 0.25 mM hydrogen peroxide.

**Table S3.** Genes that are highly induced by cold shock and other stressors in the cyanobacterium *Synechocystis* sp. strain PCC 6803

| ORF                         | Gene                        | Protein               | Function                                   | Abiotic stressor |      |      |       |      |    | Redox |      | ROS                           |
|-----------------------------|-----------------------------|-----------------------|--------------------------------------------|------------------|------|------|-------|------|----|-------|------|-------------------------------|
|                             |                             |                       |                                            | Cold             | Salt | Osmo | Light | UV-B | pH | DBMIB | DCMU | H <sub>2</sub> O <sub>2</sub> |
| <i>slI0790</i>              | <i>hik31</i>                | Hik31                 | Two-component sensor histidine kinase      | +                |      |      |       |      |    | +     |      |                               |
| <i>slr1594</i>              | <i>rre5</i>                 | Rre5                  | Response regulator                         | +                |      |      | +     |      |    | +     |      |                               |
| <i>slr0083</i>              | <i>crhR</i>                 | CrhR                  | RNA helicase                               | +                | +    | +    | +     |      |    | +     |      |                               |
| <i>slI0517</i>              | <i>rbpA1</i>                | RbpA1                 | RNA binding protein A1                     | +                |      |      |       |      |    |       |      | +                             |
| <i>slI0533</i>              | <i>tig</i>                  | Tig                   | Ribosome trigger factor                    | +                |      | +    | +     |      |    |       |      |                               |
| <i>slI1096</i>              | <i>rpsL</i>                 | Rps12                 | 30S ribosomal protein S12                  | +                |      | +    | +     |      |    |       |      |                               |
| <i>slr0082</i>              | <i>rimO</i>                 | RimO                  | Methyltransferase of ribosomal protein S12 | +                | +    | +    | +     |      |    | +     |      |                               |
| <i>slr1105</i>              | <i>typA</i>                 | TypA                  | GTP-binding protein TypA/BipA              | +                |      | +    | +     |      |    | +     |      | +                             |
| <i>slr1512</i> <sup>1</sup> | <i>sbtA</i> <sup>1</sup>    | SbtA <sup>1</sup>     | Na-dependent bicarbonate transporter       | +                |      |      | +     |      |    |       |      | +                             |
| <i>slI1541</i>              | <i>syc2</i>                 | Syc2                  | Carotenoid oxygenase                       | +                | +    |      | +     | +    |    | +     |      | +                             |
| <i>slr1291</i>              | <i>ndhD2</i>                | NdhD2                 | NADH dehydrogenase subunit 4               | +                |      |      | +     | +    |    | +     |      | +                             |
| <i>ssl2542</i>              | <i>hliA</i>                 | HliA                  | High light inducible protein               | +                | +    | +    | +     | +    |    | +     |      | +                             |
| <i>ssr2595</i>              | <i>hliB</i>                 | HliB                  | High light inducible protein               | +                | +    | +    | +     | +    | +  | +     | +    |                               |
| <i>slr1544</i>              | <i>lilA</i>                 | LilA                  | Light-harvesting protein LilA              | +                | +    | +    | +     | +    | +  | +     | +    | +                             |
| <i>slr1687</i>              | <i>nblB</i>                 | NblB                  | Phycocyanobilin lyase NblB                 | +                | +    | +    | +     | +    | +  | +     | +    | +                             |
| <i>slI1742</i>              | <i>nusG</i>                 | NusG                  | Transcription antitermination protein      | +                | +    | +    | +     |      |    |       |      | +                             |
| <i>slI1818</i>              | <i>rpoA</i>                 | RpoA                  | RNA polymerase alpha subunit $\sigma^{70}$ | +                |      | +    | +     |      |    |       |      |                               |
| <i>slI2012</i> <sup>1</sup> | <i>sigD</i> <sup>1</sup>    | SigD <sup>1</sup>     | RNA polymerase sigma factor SigD           | +                | +    |      | +     | +    | +  | +     | +    | +                             |
| <i>ssl3044</i> <sup>1</sup> | <i>ssl3044</i> <sup>1</sup> | Fdx <sup>1</sup>      | Ferredoxin                                 | +                | +    | +    | +     | +    | +  | +     |      | +                             |
| <i>slr1350</i>              | <i>desA</i>                 | DesA                  | $\Delta 12$ fatty acid desaturase          | +                |      |      | +     |      |    |       |      |                               |
| <i>slI1441</i>              | <i>desB</i>                 | DesB                  | $\omega 3$ fatty acid desaturase           | +                |      |      | +     |      |    |       |      |                               |
| <i>slr1992</i>              | <i>gpx2</i>                 | Gpx2                  | Hydroperoxy fatty acid reductase           | +                |      |      | +     | +    |    |       |      |                               |
| <i>slI1483</i>              | <i>slI1483</i>              |                       | Salt-induced periplasmic protein           | +                | +    | +    | +     | +    | +  | +     | +    | +                             |
| <i>slI0157</i>              | <i>slI0157</i>              |                       | Zn-dependent hydrolase                     | +                | +    | +    |       | +    |    | +     |      |                               |
| <i>slI0668</i> <sup>1</sup> | <i>slI0668</i> <sup>1</sup> | ISY352e2 <sup>1</sup> | Transposase                                | +                | +    |      | +     |      |    |       |      |                               |
| <i>slI1863</i>              | <i>slI1863</i>              |                       | Unknown protein                            | +                | +    | +    |       |      |    |       |      | +                             |
| <i>slI1862</i> <sup>1</sup> | <i>slI1862</i> <sup>1</sup> |                       | Unknown protein                            | +                | +    | +    |       |      |    |       |      | +                             |
| <i>slI1853</i> <sup>1</sup> | <i>slI1853</i> <sup>1</sup> |                       | Unknown protein                            | +                | +    |      |       |      |    | +     |      |                               |
| <i>slr0551</i>              | <i>slr0551</i>              |                       | Unknown protein                            | +                |      | +    | +     | +    |    | +     | +    |                               |
| <i>slr0959</i>              | <i>slr0959</i>              |                       | Unknown protein                            | +                | +    |      | +     | +    |    |       |      |                               |
| <i>slr1686</i> <sup>1</sup> | <i>slr1686</i> <sup>1</sup> |                       | Unknown protein                            | +                | +    |      | +     | +    |    |       |      | +                             |
| <i>slr1687</i> <sup>1</sup> | <i>slr1687</i> <sup>1</sup> |                       | Unknown protein                            | +                | +    |      | +     | +    |    |       |      | +                             |

<sup>1</sup> Genes that are induced by both cold and heat shock; RF, open reading frame; Cold, cold stress (22°C); Salt, salt stress (0.5 M NaCl); Osmo, hyperosmotic stress (0.5 M sorbitol); Light, light stress (300  $\mu\text{mol photons}/(\text{m}^2 \text{ s})$ ); UV, exposure to UVB; pH, lower pH ~4.0; DBMIB, 10  $\mu\text{M}$  2,5-dibromo-6-isopropyl-3-methyl-1,4-benzoquinone; DCMU, 10  $\mu\text{M}$  3-(3,4-dichlorophenyl)-1,1-dimethylurea; H<sub>2</sub>O<sub>2</sub>, 0.25 mM hydrogen peroxide.
